# Supplementary material for: Experimental and theoretical interpretation of the magnetic behavior of two Dy(iii) single-ion magnets constructed through β-diketonate ligands with different substituent groups (–Cl/–OCH3)
Source: Royal Society of Chemistry journal article supplement (doi:10.1039/c8ra06240d), 2018-01-01
Supplement: c8ra06240d1.pdf [file c8ra06240d1.pdf]

## Experimental and Theoretical Interpretation on the Magnetic Behavior for Two Dy (III) Single-Ion Magnets Constructed Through $\beta$ -Diketonate Ligands with Different Substituent Groups (-Cl/-OCH<sub>3</sub>)

Sheng Zhang,<sup>a,c\*</sup> Wenjiao Mo,<sup>a</sup> Jiangwei Zhang,<sup>d</sup> Haipeng Wu,<sup>b</sup> Min Li,<sup>b</sup> Xingqiang Lü,<sup>c</sup> Bing Yin,<sup>b\*</sup> Desuo Yang<sup>a\*</sup>

<sup>a</sup> College of Chemistry and Chemical Engineering, Baoji University of Arts and Sciences, Baoji 721013, China.

<sup>b</sup> Key Laboratory of Synthetic and Natural Functional Molecule Chemistry of Ministry of Education, College of Chemistry and Materials Science, Northwest University, Xi'an, Shaanxi 710069, China.

<sup>c</sup> School of Chemical Engineering, Shaanxi Key Laboratory of Degradable Medical Material, Northwest University, Xi'an 710069, Shaanxi, China

<sup>d</sup> State Key Laboratory of Catalysis & Gold Catalysis Research Center, Dalian Institute of Chemical Physics, Chinese Academy of Sciences (CAS)

**Table S1** Crystal data and structure refinement details for **Cl-1** and **CH<sub>3</sub>O-2**.

| Compound                        | Cl-1                                                                                           | CH <sub>3</sub> O-2                                                            |
|---------------------------------|------------------------------------------------------------------------------------------------|--------------------------------------------------------------------------------|
| Empirical formula               | C <sub>42</sub> H <sub>23</sub> Cl <sub>3</sub> DyF <sub>9</sub> N <sub>2</sub> O <sub>6</sub> | C <sub>45</sub> H <sub>32</sub> DyF <sub>9</sub> N <sub>2</sub> O <sub>9</sub> |
| CCDC                            | 1815606                                                                                        | 1815605                                                                        |
| <i>T</i> (K)                    | 293 (2)                                                                                        | 130 (2)                                                                        |
| Formula weight                  | 1091.47                                                                                        | 1078.23                                                                        |
| Crystal system                  | Triclinic                                                                                      | Triclinic                                                                      |
| Space group                     | <i>p</i> -1                                                                                    | <i>p</i> -1                                                                    |
| <i>a</i> /Å                     | 11.5704(11)                                                                                    | 10.7420(16)                                                                    |
| <i>b</i> /Å                     | 12.1367(11)                                                                                    | 12.7566(17)                                                                    |
| <i>c</i> /Å                     | 15.4949(13)                                                                                    | 16.960(2)                                                                      |
| $\alpha$ /°                     | 98.652(7)                                                                                      | 85.703(11)                                                                     |
| $\beta$ /°                      | 100.231(8)                                                                                     | 80.218(12)                                                                     |
| $\gamma$ /°                     | 102.305(8)                                                                                     | 66.118(13)                                                                     |
| <i>V</i> /Å <sup>3</sup>        | 2051.6(3)                                                                                      | 2094.1(5)                                                                      |
| <i>Z</i>                        | 2                                                                                              | 2                                                                              |
| $\rho$ calc./g·cm <sup>-3</sup> | 1.767                                                                                          | 1.710                                                                          |
| $\mu$ /mm <sup>-1</sup>         | 12.367                                                                                         | 10.442                                                                         |
| <i>F</i> (000)                  | 1070                                                                                           | 1070                                                                           |
| $\theta$ min-max/°              | 4.335 to 59.999                                                                                | 3.922 to 68.524                                                                |
| Total reflections               | 11224                                                                                          | 14387                                                                          |

|                                            |                 |                 |
|--------------------------------------------|-----------------|-----------------|
| Unique reflections                         | 6059            | 7479            |
| Goodness-of-fit on $F^2$                   | 1.008           | 1.027           |
| $R_1/wR_2$ [ $I > 2\sigma(I)$ ]            | 0.0639 / 0.0855 | 0.0635 / 0.1479 |
| $R_1/wR_2$ [all data]                      | 0.1255 / 0.1123 | 0.0961 / 0.1863 |
| Largest peak and hole/ e $\text{\AA}^{-1}$ | 0.970 / -0.765  | 0.564 / -0.727  |

$$* R_1 = \frac{\sum \|F_0\| - |F_c|}{\sum |F_0|}, wR_2 = \frac{[\sum(F_0^2 - F_c^2) / \sum w(F_0^2)]^{1/2}}{w}, w = [\sigma_c^2(F_0^2) + (xP)^2 + yP^2]^{-1}, P = (F_0^2 + 2F_c^2) / 3$$

**Table S2** Selected bond lengths ( $\text{\AA}$ ) and angles ( $^\circ$ ) for **Cl-1** and **CH<sub>3</sub>O-2**.

| <b>Cl-1</b>     |          |                 |          |
|-----------------|----------|-----------------|----------|
| Dy(1)-O(2)      | 2.319(7) | O(2)-Dy(1)-O(1) | 72.6(2)  |
| Dy(1)-O(6)      | 2.321(6) | O(6)-Dy(1)-O(1) | 138.2(2) |
| Dy(1)-O(5)      | 2.330(6) | O(5)-Dy(1)-O(1) | 77.2(2)  |
| Dy(1)-O(3)      | 2.339(6) | O(3)-Dy(1)-O(1) | 72.9(2)  |
| Dy(1)-O(4)      | 2.352(6) | O(4)-Dy(1)-O(1) | 139.1(2) |
| Dy(1)-O(1)      | 2.369(6) | O(2)-Dy(1)-N(1) | 105.5(2) |
| Dy(1)-N(1)      | 2.544(8) | O(6)-Dy(1)-N(1) | 138.8(3) |
| Dy(1)-N(2)      | 2.586(8) | O(5)-Dy(1)-N(1) | 147.3(2) |
| O(2)-Dy(1)-O(6) | 75.8(2)  | O(3)-Dy(1)-N(1) | 77.4(3)  |
| O(2)-Dy(1)-O(5) | 85.1(2)  | O(4)-Dy(1)-N(1) | 77.3(3)  |
| O(6)-Dy(1)-O(5) | 73.4(2)  | O(1)-Dy(1)-N(1) | 76.8(2)  |
| O(2)-Dy(1)-O(3) | 143.6(2) | O(2)-Dy(1)-N(2) | 77.3(2)  |
| O(6)-Dy(1)-O(3) | 126.1(2) | O(6)-Dy(1)-N(2) | 76.8(2)  |
| O(5)-Dy(1)-O(3) | 76.3(2)  | O(5)-Dy(1)-N(2) | 148.3(2) |
| O(2)-Dy(1)-O(4) | 145.5(2) | O(3)-Dy(1)-N(2) | 131.8(3) |
| O(6)-Dy(1)-O(4) | 80.2(2)  | O(4)-Dy(1)-N(2) | 73.4(2)  |
| O(5)-Dy(1)-O(4) | 111.4(2) | O(1)-Dy(1)-N(2) | 120.8(2) |
| O(3)-Dy(1)-O(4) | 70.9(2)  | N(1)-Dy(1)-N(2) | 63.9(3)  |

| <b>CH<sub>3</sub>O-2</b> |            |                 |            |
|--------------------------|------------|-----------------|------------|
| Dy(1)-O(1)               | 2.305(7)   | O(1)-Dy(1)-N(1) | 78.9(2)    |
| Dy(1)-O(5)               | 2.307(5)   | O(5)-Dy(1)-N(1) | 150.0(2)   |
| Dy(1)-O(8)               | 2.312(6)   | O(8)-Dy(1)-N(1) | 130.0(2)   |
| Dy(1)-O(2)               | 2.318(5)   | O(2)-Dy(1)-N(1) | 121.0(2)   |
| Dy(1)-O(7)               | 2.337(6)   | O(7)-Dy(1)-N(1) | 80.8(2)    |
| Dy(1)-O(4)               | 2.350(5)   | O(4)-Dy(1)-N(1) | 78.28(19)  |
| Dy(1)-N(1)               | 2.554(6)   | O(1)-Dy(1)-N(2) | 103.3(2)   |
| Dy(1)-N(2)               | 2.571(6)   | O(5)-Dy(1)-N(2) | 146.0(2)   |
| O(1)-Dy(1)-O(5)          | 88.0(2)    | O(8)-Dy(1)-N(2) | 75.4(2)    |
| O(1)-Dy(1)-O(8)          | 140.71(19) | O(2)-Dy(1)-N(2) | 75.06(19)  |
| O(5)-Dy(1)-O(8)          | 75.76(19)  | O(7)-Dy(1)-N(2) | 90.3(2)    |
| O(1)-Dy(1)-O(2)          | 71.2(2)    | O(4)-Dy(1)-N(2) | 141.19(18) |

|                 |            |                 |            |
|-----------------|------------|-----------------|------------|
| O(5)-Dy(1)-O(2) | 78.70(19)  | N(1)-Dy(1)-N(2) | 63.9(2)    |
| O(8)-Dy(1)-O(2) | 70.6(2)    | O(1)-Dy(1)-N(1) | 78.9(2)    |
| O(1)-Dy(1)-O(7) | 147.2(2)   | O(5)-Dy(1)-N(1) | 150.0(2)   |
| O(5)-Dy(1)-O(7) | 97.1(2)    | O(8)-Dy(1)-N(1) | 130.0(2)   |
| O(8)-Dy(1)-O(7) | 71.31(19)  | O(2)-Dy(1)-N(1) | 121.0(2)   |
| O(2)-Dy(1)-O(7) | 141.6(2)   | O(7)-Dy(1)-N(1) | 80.8(2)    |
| O(1)-Dy(1)-O(4) | 76.2(2)    | O(4)-Dy(1)-N(1) | 78.28(19)  |
| O(5)-Dy(1)-O(4) | 72.39(18)  | O(1)-Dy(1)-N(2) | 103.3(2)   |
| O(8)-Dy(1)-O(4) | 129.3(2)   | O(5)-Dy(1)-N(2) | 146.0(2)   |
| O(2)-Dy(1)-O(4) | 136.71(19) | O(8)-Dy(1)-N(2) | 75.4(2)    |
| O(7)-Dy(1)-O(4) | 74.7(2)    | O(2)-Dy(1)-N(2) | 75.06(19)  |
| O(8)-Dy(1)-N(1) | 130.0(2)   | O(7)-Dy(1)-N(2) | 90.3(2)    |
| O(2)-Dy(1)-N(1) | 121.0(2)   | O(4)-Dy(1)-N(2) | 141.19(18) |
| O(7)-Dy(1)-N(1) | 80.8(2)    | N(1)-Dy(1)-N(2) | 63.9(2)    |
| O(4)-Dy(1)-N(1) | 78.28(19)  | O(1)-Dy(1)-N(1) | 78.9(2)    |
| O(1)-Dy(1)-N(2) | 103.3(2)   | O(5)-Dy(1)-N(1) | 150.0(2)   |

**Table S3** Dy<sup>III</sup> ion geometry analysis by SHAPE 2.1 software.

| Configuration                                                         | ABOXIY,<br>CI-1 | ABOXIY,<br>CH <sub>3</sub> O-2 | ABOXIY,<br>CH <sub>3</sub> -3 | ABOXIY, CH <sub>3</sub> -4<br>(solvent) | ABOXIY,<br>F-5 |
|-----------------------------------------------------------------------|-----------------|--------------------------------|-------------------------------|-----------------------------------------|----------------|
| Hexagonal bipyramid ( <i>D</i> <sub>6h</sub> )                        | 15.904          | 15.904                         | 15.235                        | 16.278                                  | 15.550         |
| Cube ( <i>O</i> <sub>h</sub> )                                        | 10.507          | 9.035                          | 8.971                         | 9.645                                   | 10.541         |
| Square antiprism ( <i>D</i> <sub>4d</sub> )                           | 0.791           | 1.888                          | 1.520                         | 0.484                                   | 1.344          |
| Triangular dodecahedron ( <i>D</i> <sub>2d</sub> )                    | 1.341           | 0.621                          | 0.792                         | 2.106                                   | 1.509          |
| Johnson gyrobifastigium J26 ( <i>D</i> <sub>2d</sub> )                | 14.375          | 14.958                         | 14.859                        | 15.939                                  | 14.497         |
| Johnson elongated triangular bipyramid J14 ( <i>D</i> <sub>3h</sub> ) | 27.695          | 29.352                         | 29.178                        | 27.903                                  | 28.104         |
| Biaugmented trigonal prism J50 ( <i>C</i> <sub>2v</sub> )             | 2.296           | 2.743                          | 2.404                         | 2.376                                   | 1.785          |
| Biaugmented trigonal prism ( <i>C</i> <sub>2v</sub> )                 | 1.935           | 1.957                          | 1.792                         | 1.737                                   | 1.314          |
| Snub sphenoid J84 ( <i>D</i> <sub>2d</sub> )                          | 3.732           | 3.565                          | 3.429                         | 4.992                                   | 4.070          |

## CI-1

|          |        |                                            |
|----------|--------|--------------------------------------------|
| HBPY-8   | 3 D6h  | Hexagonal bipyramid                        |
| CU-8     | 4 Oh   | Cube                                       |
| SAPR-8   | 5 D4d  | Square antiprism                           |
| TDD-8    | 6 D2d  | Triangular dodecahedron                    |
| JGBF-8   | 7 D2d  | Johnson gyrobifastigium J26                |
| JETBPY-8 | 8 D3h  | Johnson elongated triangular bipyramid J14 |
| JBTPR-8  | 9 C2v  | Biaugmented trigonal prism J50             |
| BTPR-8   | 10 C2v | Biaugmented trigonal prism                 |
| JSD-8    | 11 D2d | Snub diphenoid J84                         |

|                 |        |         |         |        |        |          |
|-----------------|--------|---------|---------|--------|--------|----------|
| Structure [ML8] | HBPY-8 | CU-8    | SAPR-8  | TDD-8  | JGBF-8 | JETBPY-8 |
| JBTPR-8         | BTPR-8 | JSD-8   |         |        |        |          |
| ABOXIY          | ,      | 16.745, | 10.507, | 0.791, | 1.341, | 14.375,  |
| 1.935,          | 3.732  |         |         |        |        | 27.695,  |
|                 |        |         |         |        |        | 2.296,   |

## CH<sub>3</sub>O-2

|          |        |                                            |
|----------|--------|--------------------------------------------|
| HBPY-8   | 3 D6h  | Hexagonal bipyramid                        |
| CU-8     | 4 Oh   | Cube                                       |
| SAPR-8   | 5 D4d  | Square antiprism                           |
| TDD-8    | 6 D2d  | Triangular dodecahedron                    |
| JGBF-8   | 7 D2d  | Johnson gyrobifastigium J26                |
| JETBPY-8 | 8 D3h  | Johnson elongated triangular bipyramid J14 |
| JBTPR-8  | 9 C2v  | Biaugmented trigonal prism J50             |
| BTPR-8   | 10 C2v | Biaugmented trigonal prism                 |
| JSD-8    | 11 D2d | Snub diphenoid J84                         |

| Structure [ML8 ] | HBPY-8    | CU-8   | SAPR-8 | TDD-8  | JGBF-8  | JETBPY-8 |        |
|------------------|-----------|--------|--------|--------|---------|----------|--------|
| JBTPR-8          | BTPR-8    | JSD-8  |        |        |         |          |        |
| ABOXIY           | , 15.904, | 9.035, | 1.888, | 0.621, | 14.958, | 29.352,  | 2.743, |
|                  | 1.957,    | 3.565  |        |        |         |          |        |

### CH<sub>3</sub>-3

|          |        |                                            |
|----------|--------|--------------------------------------------|
| HBPY-8   | 3 D6h  | Hexagonal bipyramid                        |
| CU-8     | 4 Oh   | Cube                                       |
| SAPR-8   | 5 D4d  | Square antiprism                           |
| TDD-8    | 6 D2d  | Triangular dodecahedron                    |
| JGBF-8   | 7 D2d  | Johnson gyrobifastigium J26                |
| JETBPY-8 | 8 D3h  | Johnson elongated triangular bipyramid J14 |
| JBTPR-8  | 9 C2v  | Biaugmented trigonal prism J50             |
| BTPR-8   | 10 C2v | Biaugmented trigonal prism                 |
| JSD-8    | 11 D2d | Snub diphenoid J84                         |

| Structure [ML8 ] | HBPY-8    | CU-8   | SAPR-8 | TDD-8  | JGBF-8  | JETBPY-8 | JBTPR-8 | BTPR-8 | JSD-8 |
|------------------|-----------|--------|--------|--------|---------|----------|---------|--------|-------|
| ABOXIY           | , 15.235, | 8.971, | 1.520, | 0.792, | 14.859, | 29.178,  | 2.404,  | 1.792, | 3.429 |

### CH<sub>3</sub>-4 (solvent)

|          |        |                                            |
|----------|--------|--------------------------------------------|
| HBPY-8   | 3 D6h  | Hexagonal bipyramid                        |
| CU-8     | 4 Oh   | Cube                                       |
| SAPR-8   | 5 D4d  | Square antiprism                           |
| TDD-8    | 6 D2d  | Triangular dodecahedron                    |
| JGBF-8   | 7 D2d  | Johnson gyrobifastigium J26                |
| JETBPY-8 | 8 D3h  | Johnson elongated triangular bipyramid J14 |
| JBTPR-8  | 9 C2v  | Biaugmented trigonal prism J50             |
| BTPR-8   | 10 C2v | Biaugmented trigonal prism                 |
| JSD-8    | 11 D2d | Snub diphenoid J84                         |

| Structure [ML8 ] | HBPY-8    | CU-8   | SAPR-8 | TDD-8  | JGBF-8  | JETBPY-8 | JBTPR-8 | BTPR-8 | JSD-8 |
|------------------|-----------|--------|--------|--------|---------|----------|---------|--------|-------|
| ABOXIY           | , 16.278, | 9.645, | 0.484, | 2.106, | 15.939, | 27.903,  | 2.376,  | 1.737, | 4.992 |

### F-5

|          |        |                                            |
|----------|--------|--------------------------------------------|
| HBPY-8   | 3 D6h  | Hexagonal bipyramid                        |
| CU-8     | 4 Oh   | Cube                                       |
| SAPR-8   | 5 D4d  | Square antiprism                           |
| TDD-8    | 6 D2d  | Triangular dodecahedron                    |
| JGBF-8   | 7 D2d  | Johnson gyrobifastigium J26                |
| JETBPY-8 | 8 D3h  | Johnson elongated triangular bipyramid J14 |
| JBTPR-8  | 9 C2v  | Biaugmented trigonal prism J50             |
| BTPR-8   | 10 C2v | Biaugmented trigonal prism                 |
| JSD-8    | 11 D2d | Snub diphenoid J84                         |

| Structure [ML8 ] | HBPY-8    | CU-8    | SAPR-8 | TDD-8  | JGBF-8  | JETBPY-8 | JBTPR-8 | BTPR-8 | JSD-8 |
|------------------|-----------|---------|--------|--------|---------|----------|---------|--------|-------|
| ABOXIY           | , 15.550, | 10.541, | 1.344, | 1.509, | 14.497, | 28.104,  | 1.785,  | 1.314, | 4.070 |

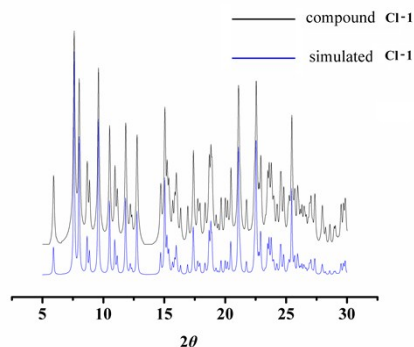

(a)

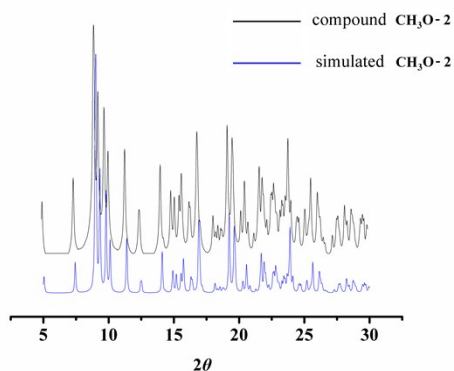

(b)

Fig. S1 XRPD curves of Cl-1 (a) and CH<sub>3</sub>O-2 (b).

Table S4 Relaxation fitting parameters from Least-Squares Fitting of  $\chi(\omega)$  data of Cl-1.

| $\Delta\chi_1$<br>(cm <sup>3</sup> mol <sup>-1</sup> ) | $\Delta\chi_2$<br>(cm <sup>3</sup> mol <sup>-1</sup> ) | $\tau_0$ (s) | $\alpha_1$ | Residual    |
|--------------------------------------------------------|--------------------------------------------------------|--------------|------------|-------------|
| 0.260267                                               | 2.88972                                                | 0.00108023   | 0.152772   | 0.0544879   |
| 0.235467                                               | 2.63226                                                | 0.00108632   | 0.154364   | 0.0448944   |
| 0.215929                                               | 2.41606                                                | 0.00109073   | 0.154924   | 0.0387642   |
| 0.198845                                               | 2.23348                                                | 0.00109272   | 0.155788   | 0.0334581   |
| 0.185081                                               | 2.11559                                                | 0.00109064   | 0.159417   | 0.0315545   |
| 0.161256                                               | 1.82153                                                | 0.00109452   | 0.158183   | 0.0230387   |
| 0.151712                                               | 1.71551                                                | 0.00109334   | 0.158845   | 0.0203543   |
| 0.143558                                               | 1.62042                                                | 0.00109116   | 0.159116   | 0.018353    |
| 0.135971                                               | 1.53591                                                | 0.00108856   | 0.159742   | 0.016524    |
| 0.129317                                               | 1.45934                                                | 0.00108448   | 0.159882   | 0.0150249   |
| 0.117977                                               | 1.32793                                                | 0.00107534   | 0.160704   | 0.0121908   |
| 0.109049                                               | 1.2178                                                 | 0.00106267   | 0.160384   | 0.0103158   |
| 0.101474                                               | 1.12452                                                | 0.00104546   | 0.159654   | 0.0087332   |
| 0.0952804                                              | 1.04441                                                | 0.00102376   | 0.157997   | 0.00738076  |
| 0.0904192                                              | 0.974851                                               | 0.000996952  | 0.154781   | 0.0063388   |
| 0.0855923                                              | 0.899736                                               | 0.000954786  | 0.148749   | 0.00537565  |
| 0.0816003                                              | 0.83514                                                | 0.000901332  | 0.140304   | 0.00446558  |
| 0.0781279                                              | 0.779001                                               | 0.000837319  | 0.129569   | 0.00360929  |
| 0.0749899                                              | 0.729782                                               | 0.000764925  | 0.117124   | 0.00286337  |
| 0.0722477                                              | 0.686123                                               | 0.000687403  | 0.103531   | 0.00223526  |
| 0.0693756                                              | 0.647638                                               | 0.000608463  | 0.0905437  | 0.00161829  |
| 0.0642372                                              | 0.58199                                                | 0.000460389  | 0.0662283  | 0.000804666 |
| 0.0600902                                              | 0.528562                                               | 0.000338316  | 0.0462514  | 0.000370617 |
| 0.0568107                                              | 0.484583                                               | 0.000244763  | 0.03203    | 0.000155266 |
| 0.0502608                                              | 0.415816                                               | 0.000119337  | 0.0144383  | 3.37361E-05 |
| 0.0347966                                              | 0.388734                                               | 7.53425E-05  | 0.0125559  | 1.89366E-05 |
| 2.23268E-09                                            | 0.365537                                               | 4.27867E-05  | 0.0111428  | 1.64302E-05 |

**Table S5** Relaxation fitting parameters from Least-Squares Fitting of  $\chi(\omega)$  data of **CH<sub>3</sub>O-2**.

| $\Delta\chi_1$<br>(cm <sup>3</sup> mol <sup>-1</sup> ) | $\Delta\chi_2$<br>(cm <sup>3</sup> mol <sup>-1</sup> ) | $\tau_0$ (s) | $\alpha_1$ | Residual |
|--------------------------------------------------------|--------------------------------------------------------|--------------|------------|----------|
| 0.266507                                               | 3.56355                                                | 0.001515     | 0.176318   | 0.110833 |
| 0.168186                                               | 2.34622                                                | 0.001424     | 0.17889    | 0.052804 |
| 0.119823                                               | 1.74644                                                | 0.001363     | 0.1812     | 0.031467 |
| 0.091869                                               | 1.3902                                                 | 0.001296     | 0.180892   | 0.020606 |
| 0.075094                                               | 1.1541                                                 | 0.0012       | 0.175946   | 0.014766 |
| 0.064386                                               | 0.985479                                               | 0.001067     | 0.166665   | 0.011127 |
| 0.055593                                               | 0.859953                                               | 0.000912     | 0.154186   | 0.008216 |
| 0.048402                                               | 0.762001                                               | 0.000753     | 0.137986   | 0.006132 |
| 0.042738                                               | 0.683631                                               | 0.000603     | 0.120175   | 0.004326 |
| 0.037046                                               | 0.61968                                                | 0.00047      | 0.101782   | 0.002898 |
| 0.031611                                               | 0.56649                                                | 0.00036      | 0.083411   | 0.001791 |
| 0.022852                                               | 0.522052                                               | 0.000272     | 0.068876   | 0.000984 |
| 0.012178                                               | 0.484203                                               | 0.000204     | 0.054569   | 0.000493 |
| 4.46E-14                                               | 0.451358                                               | 0.000152     | 0.039521   | 0.000264 |
| 1.22E-13                                               | 0.423316                                               | 0.000118     | 0.013788   | 0.000167 |
